# Supplementary material for: Temperature effects on the contractile performance and efficiency of oxidative muscle from a eurythermal versus a stenothermal salmonid
Source: PubMed Central journal article supplement (PMC8353165; doi:10.1242/jeb.242487), 2021-08-05
Supplement: jexbio-224-242487-s1.pdf [file jexbio-224-242487-s1.pdf]

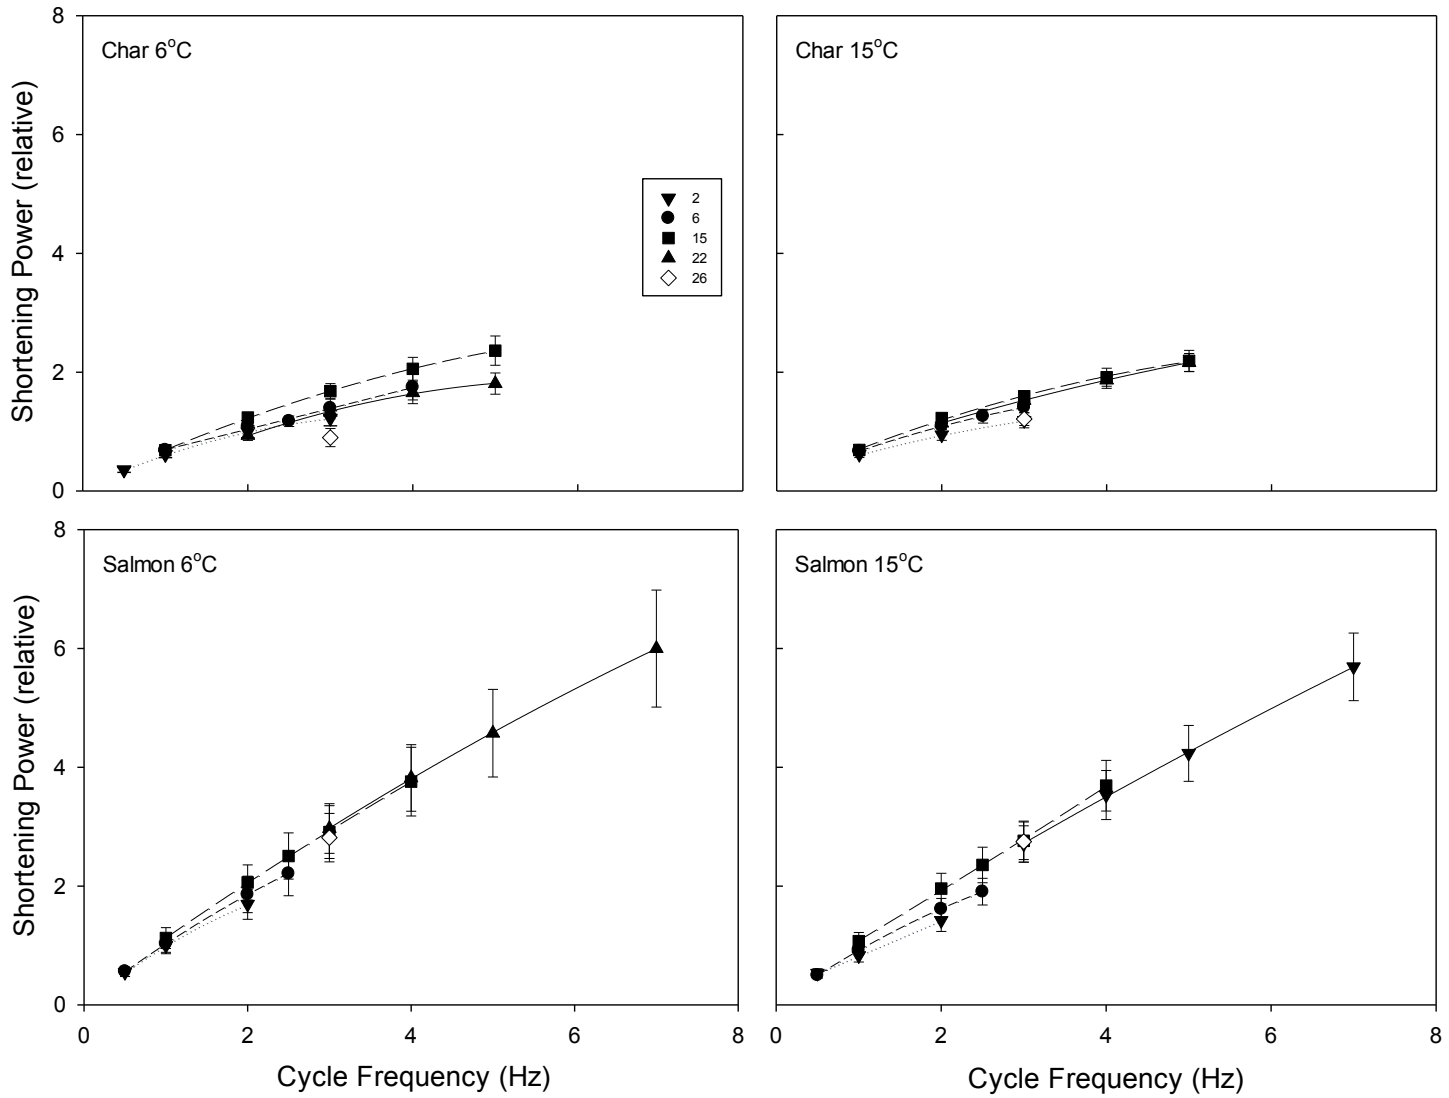

**Fig. S1. Shortening power produced by the red skeletal muscle from 6°C and 15°C acclimated Arctic char and Atlantic salmon at a range of test temperatures and contraction frequencies. Statistical tests were not performed because shortening power did not attain a maxima. See Fig. 1 for additional details.**

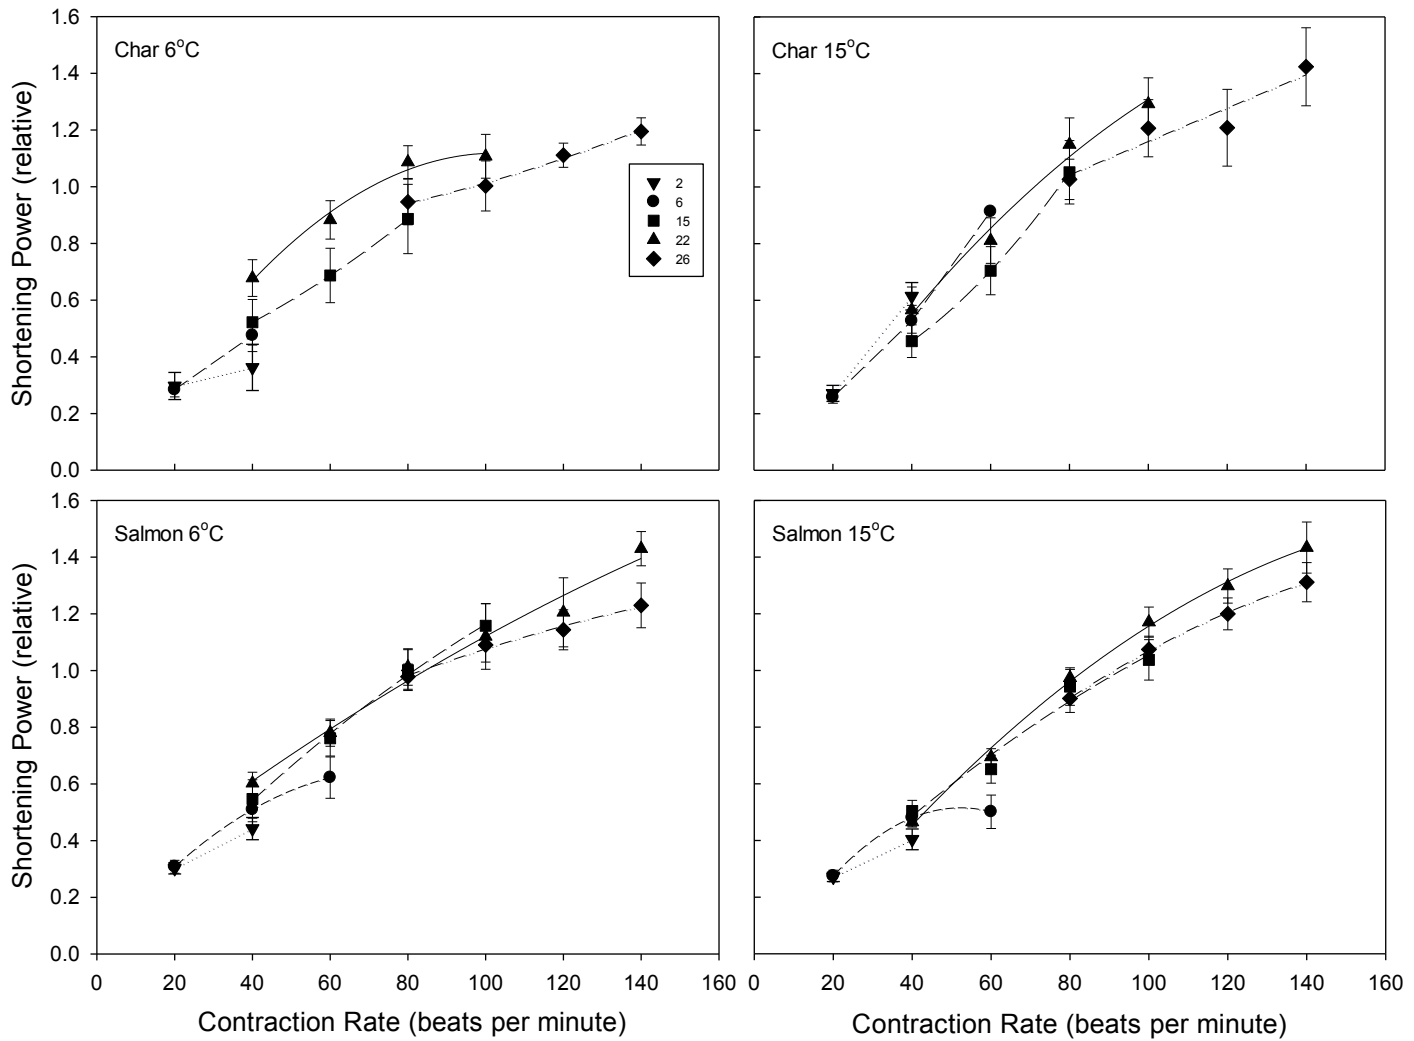

**Fig. S2.** Lengthening power (i.e., that required to stretch the muscle) of red skeletal muscle from 6°C and 15°C acclimated Arctic char and Atlantic salmon at a range of test temperatures and contraction frequencies. Statistical tests were not performed because lengthening power did not attain a maxima. See Fig. 1 for additional details.

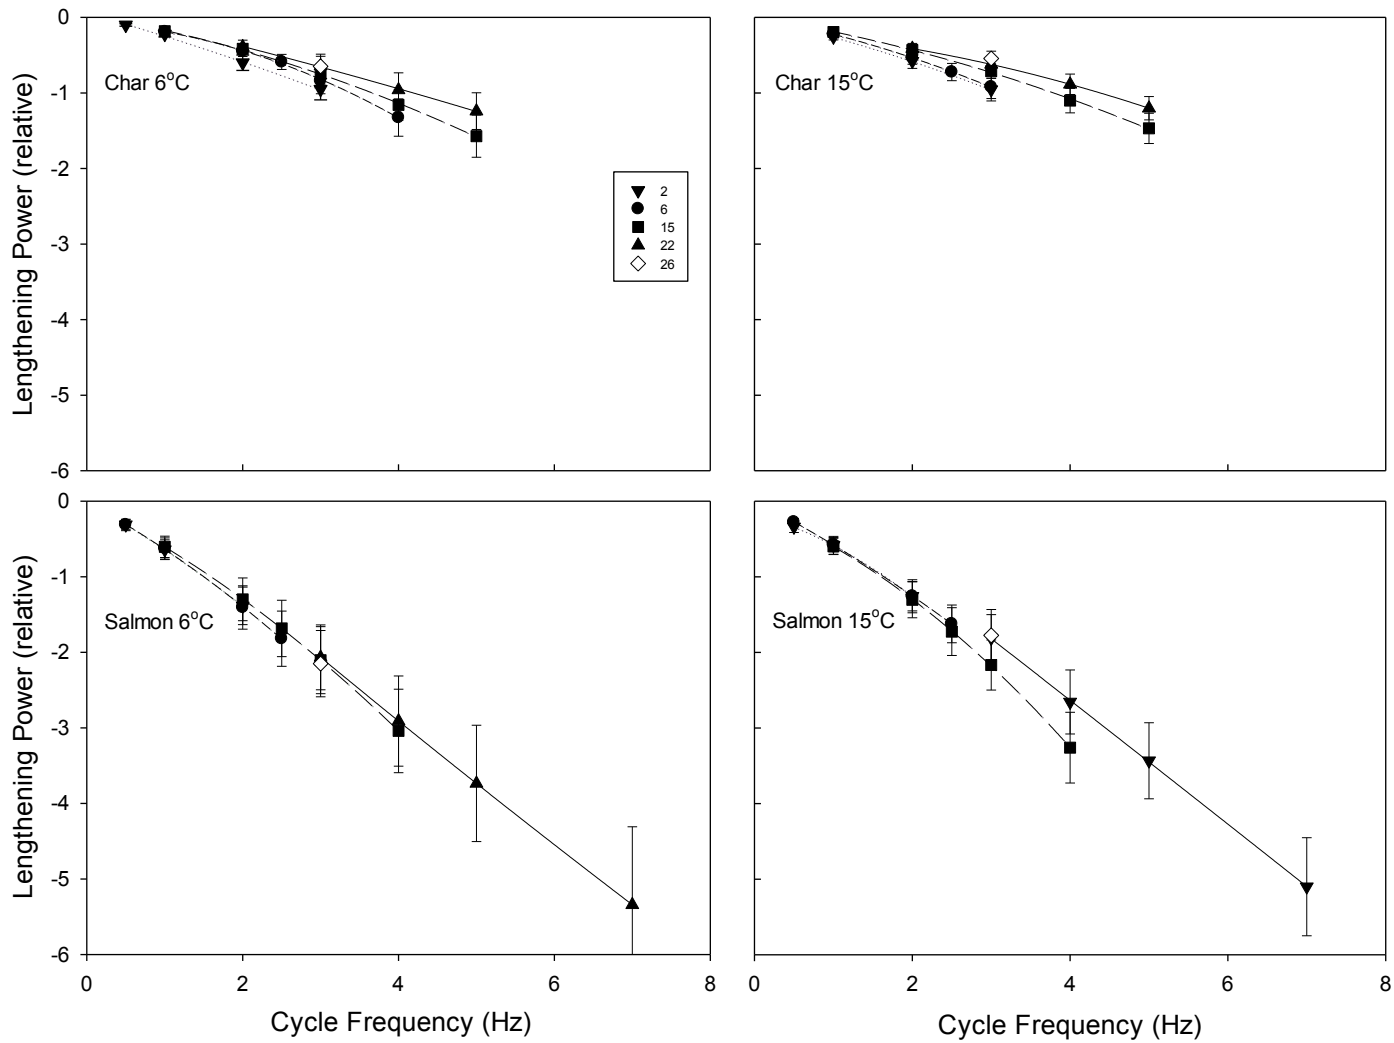

**Fig. S3. Shortening power produced by ventricular muscle strips (trabeculae) from 6oC and 15oC acclimated Arctic char and Atlantic salmon at a range of test temperatures and contraction frequencies.** Statistical tests were not performed since shortening power did not attain a maxima. See Fig. 3 for additional details.

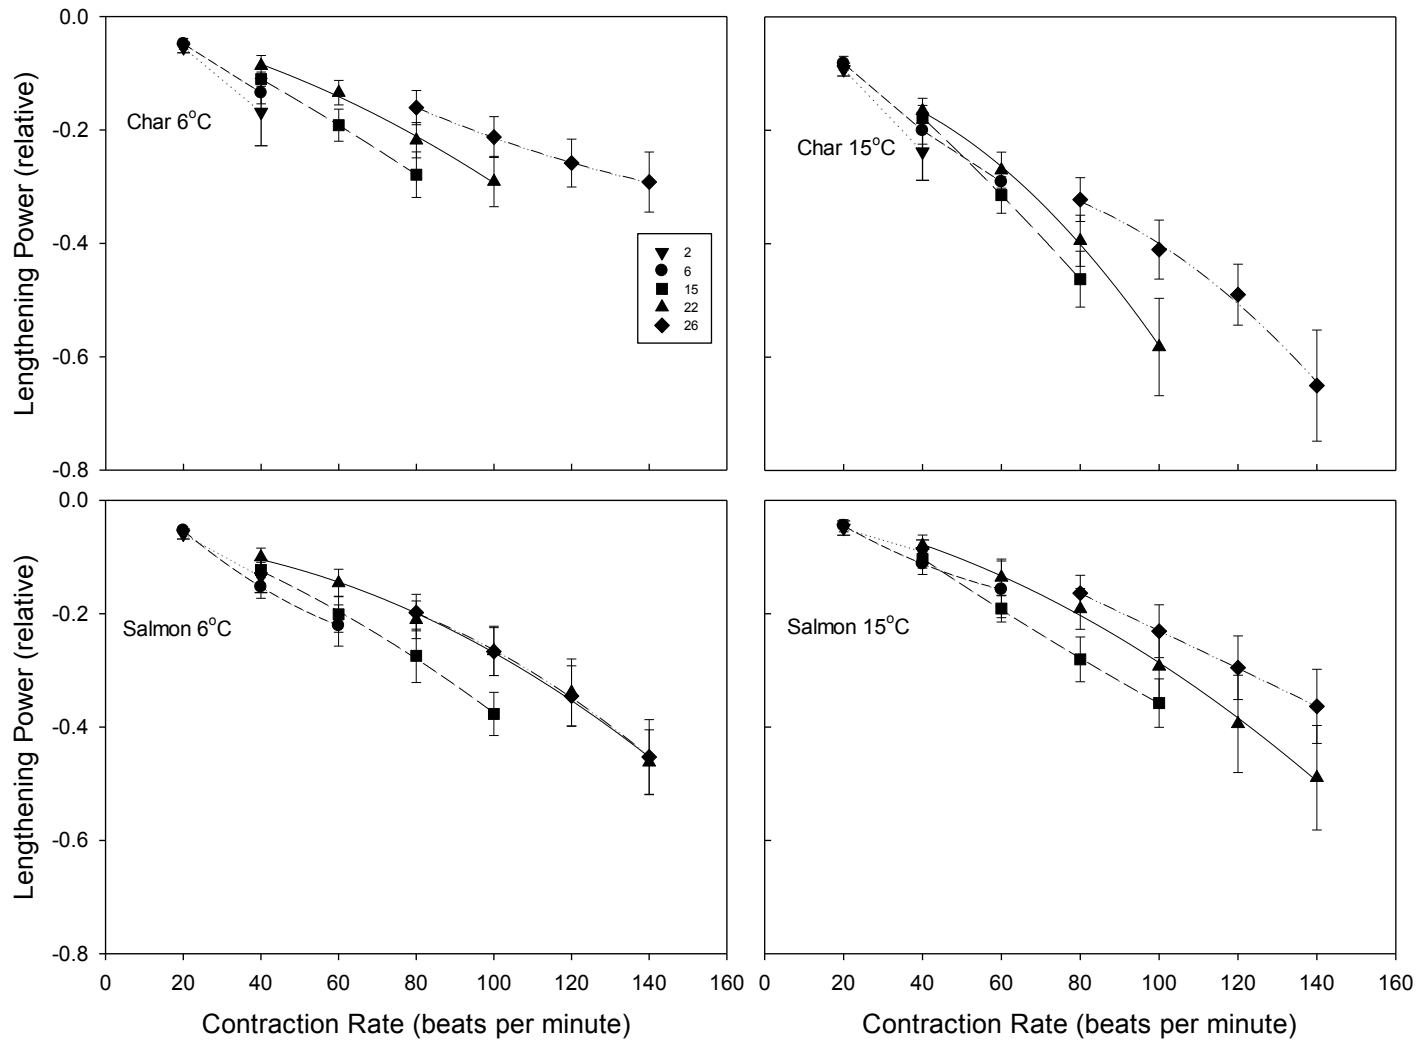

**Fig. S4.** Lengthening power (i.e., that required to stretch the muscle) of ventricular muscle strips (trabeculae) from 6°C and 15°C acclimated Arctic char and Atlantic salmon at a range of test temperatures and contraction frequencies. Statistical tests were not performed since lengthening power did not attain maxima. See Fig. 3 for additional details.

**Table S1. Parameters used to measure red skeletal muscle power.** Values are means, showing the stimulus duration (in ms): stimulation phase (% of cycle). Standard deviations are omitted to reduce clutter, but were all within 5% or less of the mean.

| Test Temp (°C) | Species / Acclimation Temp (°C) | Contraction Rate (Hz) |             |            |            |            |            |            |          |
|----------------|---------------------------------|-----------------------|-------------|------------|------------|------------|------------|------------|----------|
|                |                                 | 0.5                   | 1           | 2          | 2.5        | 3          | 4          | 5          | 7        |
| 2              | Char/6                          | 983 : 10              | 475 : 3.8   | 206 : -6.9 |            | 108 : -10  |            |            |          |
|                | Salmon/6                        | 881 : 10              | 431 : 2.5   | 170 : -3.1 |            |            |            |            |          |
|                | Char/15                         |                       | 533 : 0     | 206 : -6.7 |            | 118 : -8.9 |            |            |          |
|                | Salmon/15                       | 1000 : 10             | 513 : - 2.5 | 218 : -9.4 |            |            |            |            |          |
| 6              | Char/6                          |                       | 475 : 10    | 186 : 1.3  | 136 : -1.3 | 115 : -7.5 | 76 : -10   |            |          |
|                | Salmon/6                        | 944 : 15              | 406 : 10    | 184 : -1.3 | 143 : -5   |            |            |            |          |
|                | Char/15                         |                       | 462 : 7.2   | 198 : -0.6 | 145 : -2.8 | 116 : -5.6 |            |            |          |
|                | Salmon/15                       | 884 : 17              | 519 : 4.4   | 227 : -3.3 | 165 : -6.7 |            |            |            |          |
| 15             | Char/6                          |                       | 500 : 14    | 254 : 5.0  |            | 151 : -0.6 | 110 : -6.3 | 86 : -8.1  |          |
|                | Salmon/6                        |                       | 488 : 12    | 248 : 3.1  | 174 : 1.9  | 143 : -1.9 | 109 : -6.3 |            |          |
|                | Char/15                         |                       | 500 : 15    | 243 : 4.4  |            | 144 : -0.6 | 102 : -4.4 | 74 : -7.8  |          |
|                | Salm/15                         |                       | 521 : 10    | 249 : 1.5  | 199 : -3   | 163 : -6.5 | 121 : -12  |            |          |
| 22             | Char/6                          |                       |             | 251 : 11   |            | 183 : 2.5  | 128 : -0.8 | 103 : -3.8 |          |
|                | Salmon/6                        |                       |             |            |            | 168 : 1.3  | 129 : -4.4 | 99 : -4.3  | 67 : -10 |
|                | Char/15                         |                       |             | 262 : 9.4  |            | 168 : 3.9  | 119 : 0    | 92 : -5    |          |
|                | Salm/15                         |                       |             |            |            | 162 : 0.6  | 125 : -2.8 | 96 : -6.1  | 69 : -12 |
| 26             | Char/6                          |                       |             |            |            | 204 : 0    |            |            |          |
|                | Salmon/6                        |                       |             |            |            | 179 : 3.1  |            |            |          |
|                | Char/15                         |                       |             |            |            | 180 : 4.4  |            |            |          |
|                | Salmon/15                       |                       |             |            |            | 187 : 1.1  |            |            |          |

**Table S2. Parameters used to measure ventricular muscle (trabecular) power.** Values are means, showing the proportion of the strain cycle that comprised shortening (%): stimulation phase (% of cycle period, where 0% is equivalent to 0 degrees in a sine wave). Standard deviations are omitted to reduce clutter, but were all within 3.5% or less of the means.

| Test Temp (°C) | Species / Acclimation Temp (°C) | Contraction Rate (beats min <sup>-1</sup> ) |           |            |           |           |           |           |
|----------------|---------------------------------|---------------------------------------------|-----------|------------|-----------|-----------|-----------|-----------|
|                |                                 | 20                                          | 40        | 60         | 80        | 100       | 120       | 140       |
| 2              | Char/6                          | 44 : 6.9                                    | 60 : -8.3 |            |           |           |           |           |
|                | Salmon/6                        | 40 : 13                                     | 70 : -4   |            |           |           |           |           |
|                | Char/15                         | 40 : 4.4                                    | 70 : -6.7 |            |           |           |           |           |
|                | Salmon/15                       | 43 : 11                                     | 70 : -5.8 |            |           |           |           |           |
| 6              | Char/6                          | 30 : 18                                     | 59 : -3.1 |            |           |           |           |           |
|                | Salmon/6                        | 30 : 22                                     | 69 : -2.5 | 72 : -4    |           |           |           |           |
|                | Char/15                         | 30 : 16                                     | 53 : -3.9 | 60 : 0     |           |           |           |           |
|                | Salmon/15                       | 30 : 19                                     | 52 : -0.5 | 80 : -10   |           |           |           |           |
| 15             | Char/6                          | 20 : 33                                     | 33 : 13   | 58 : -0.63 | 69 : -6.4 | 70 : -7.5 |           |           |
|                | Salmon/6                        | 20 : 35                                     | 29 : 18   | 42 : 6.5   | 60 : -0.5 | 65 : -4.5 | 70 : -8.8 |           |
|                | Char/15                         |                                             | 40 : 12   | 60 : -1.1  | 66 : -5   |           |           |           |
|                | Salmon/15                       |                                             | 30 : 15   | 61 : -0.91 | 69 : -5   | 70 : -8.6 |           |           |
| 22             | Char/6                          |                                             | 23 : 29   | 34 : 18    | 30 : 13   | 41 : 4.3  | 65 : -2.5 | 60 : -10  |
|                | Salmon/6                        |                                             | 20 : 31   | 30 : 22    | 30 : 16   | 40 : 9.5  | 54 : 2    | 66 : -2.8 |
|                | Char/15                         |                                             | 23 : 27   | 34 : 16    | 40 : 9.4  | 59 : -1.9 | 60 : -1   | 70 : -7.5 |
|                | Salmon/15                       |                                             | 19 : 30   | 30 : 20    | 32 : 16   | 40 : 6.9  | 56 : 0    | 61 : -5.6 |
| 26             | Char/6                          |                                             |           |            | 29 : 21   | 30 : 16   | 40 : 11   | 40 : 6    |
|                | Salmon/6                        |                                             |           |            | 30 : 25   | 30 : 20   | 40 : 12   | 40 : 6.1  |
|                | Char/15                         |                                             |           |            | 30 : 19   | 39 : 13   | 40 : 10   | 40 : 2    |
|                | Salmon/15                       |                                             |           |            | 30 : 23   | 30 : 19   | 40 : 13   | 50 : 6    |

**Table S3. Parameters used to measure ventricular muscle (trabecular) efficiency at different temperatures and rates of contraction.** Phase is the time of onset of stimulation relative to the imposed strain cycle, expressed as a % of the cycle period, where 0% is equivalent to 0 degrees in a sine wave, and Short is the proportion of the strain cycle that comprised shortening, the remainder being lengthening. Temperatures indicate test temperature, and  $f_H$  is the contraction frequency. All fish were acclimated to 15°C. Values are means (SEM).

|                             | 15°C                       |                | 20°C                       |                |                             |                | 25°C                       |                |                             |             |
|-----------------------------|----------------------------|----------------|----------------------------|----------------|-----------------------------|----------------|----------------------------|----------------|-----------------------------|-------------|
|                             | $f_H$ 70 min <sup>-1</sup> |                | $f_H$ 70 min <sup>-1</sup> |                | $f_H$ 100 min <sup>-1</sup> |                | $f_H$ 70 min <sup>-1</sup> |                | $f_H$ 120 min <sup>-1</sup> |             |
|                             | Phase (%)                  | Short (%)      | Phase (%)                  | Short (%)      | Phase (%)                   | Short (%)      | Phase (%)                  | Short (%)      | Phase (%)                   | Short (%)   |
| <b>Char</b><br><b>N=8</b>   | -6.43<br>(0.854)           | 60.0<br>(0)    | 13.6<br>(0.854)            | 40.0<br>(0)    | -5.00<br>(1.01)             | 60.0<br>(0)    | 20.0<br>(0)                | 30.0<br>(0)    | 12.9<br>(1.38)              | 40.0<br>(0) |
| <b>Salmon</b><br><b>N=9</b> | -5.00<br>(0.786)           | 62.2<br>(1.39) | 14.4<br>(0.944)            | 32.2<br>(1.39) | 1.67<br>(1.36)              | 53.3<br>(2.72) | 23.9<br>(0.693)            | 28.9<br>(1.05) | 5.56<br>(0.944)             | 40.0<br>(0) |
